# Supplementary material
Source: Royal Society of Chemistry journal article supplement (doi:10.1039/d6an00420b)
Supplement: d6an00420b1.pdf [file d6an00420b1.pdf]

## Supporting Information

### Simultaneous Quantitation of Structurally Analogous Bile Acid Isomers via Charge-State-Engineered UPLC-MS

Desen Su\*<sup>1</sup>, Yunyun Zheng<sup>1</sup>, Xiuxian Lin<sup>1</sup>, Ziqiang Chen<sup>1</sup>, Minmin  
Huang<sup>1</sup>, Qinghua Yao<sup>1</sup>, Yuwu Chi<sup>2</sup>

<sup>1</sup> Institute of Quality Standards and Testing Technology for Agro-products, Fujian  
Key Laboratory of Agro-Products Quality and Safety, Fujian Academy of  
Agricultural Sciences, Fuzhou, 350003, China;

<sup>2</sup> Ministry of Education Key Laboratory for Analytical Science of Food Safety  
and Biology, and College of Chemistry, Fuzhou University, Fuzhou, Fujian  
350108, China.

\*Corresponding author: Desen Su, Tel:+86 0591 87861853, E-mail:  
sudesen@hotmail.com

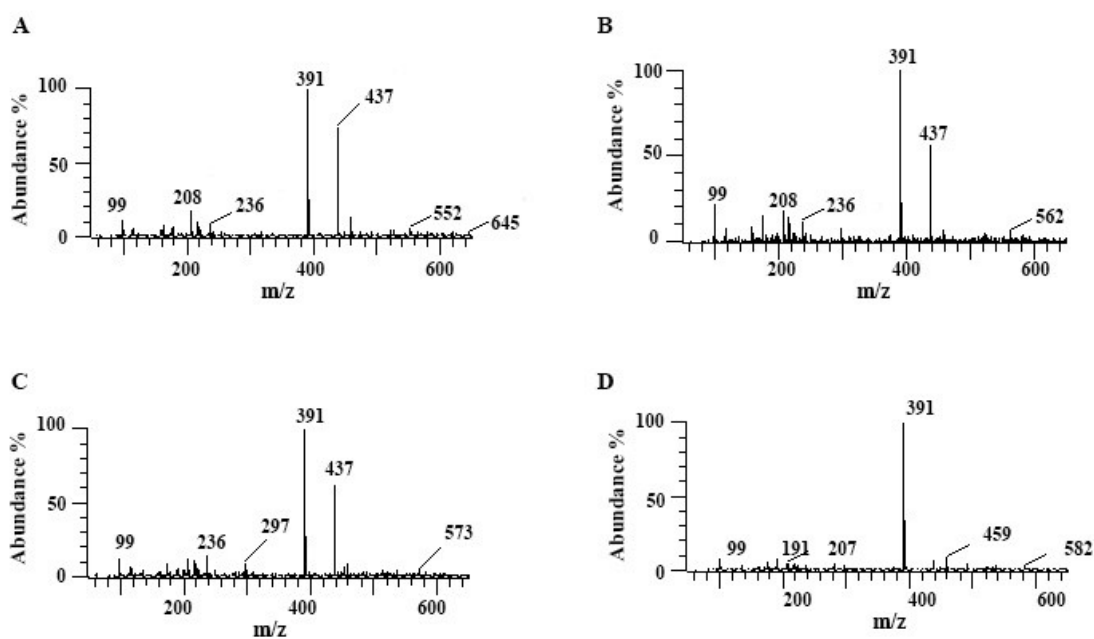

Fig. S1 Electron spray ionization mass spectra of (A) UDCA, (B) CDCA, (C) HDCA and (D) DCA in

negative ion mode. The concentration of standards was 1  $\mu\text{g/mL}$ . Acetonitrile/2 mM aqueous ammonia (50:50, v/v) was used as the mobile phase, and the injection volume was set at 2  $\mu\text{L}$ .

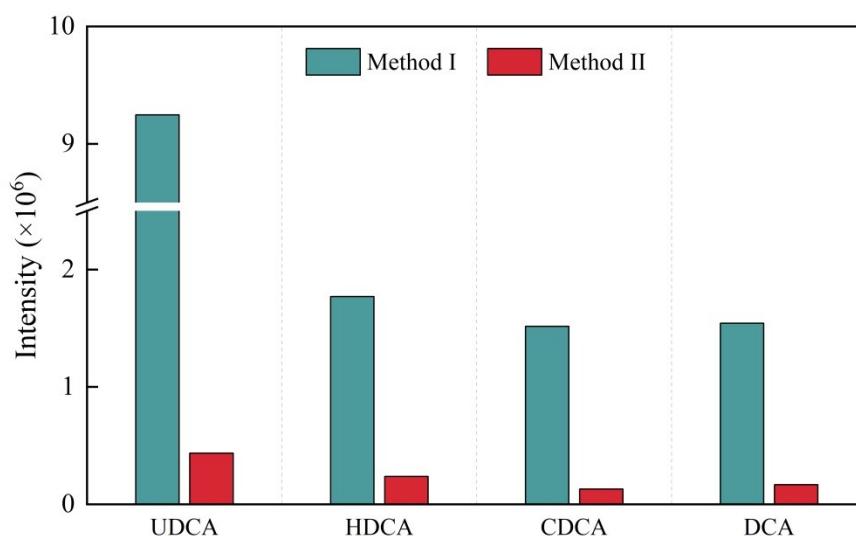

Fig. S2 Sensitivity comparison between SIM and MRM monitoring. Method I : SIM monitoring with  $[\text{M-H}]^-$  at  $m/z$  391.35; the mobile phase consisted of water(A) and acetonitrile(B), both containing 8 mM aqueous ammonia; the gradient elution program was as follows: 0 min, 15% B; 4.0 min, 22% B; 6.0 min, 30%B; 8.0 min, 40% B; 8.1 min, 15% B; 10.0 min, 15% B. Method II : MRM monitoring with transitions 357.35>339.40 and 357.35>133.20 for UDCA, 357.35>161.20 and 357.35>221.25 for HDCA, and 357.35>339.40 and 357.35>105.10 for CDCA and DCA; the mobile phase consisted of water(A), acetonitrile (B) and methanol (C), all containing 0.1% formic acid; the gradient elution program was as follows: 0 min, 70% A, 20%B, 10%C; 5.0 min, 50% A, 30%B, 20%C; 10.0 min, 25% A, 55%B, 20%C; 12.0 min, 5% A, 5%B, 90%C; 15.0 min, 70% A, 20%B, 10%C; 20.0 min, 70% A, 20%B, 10%C.

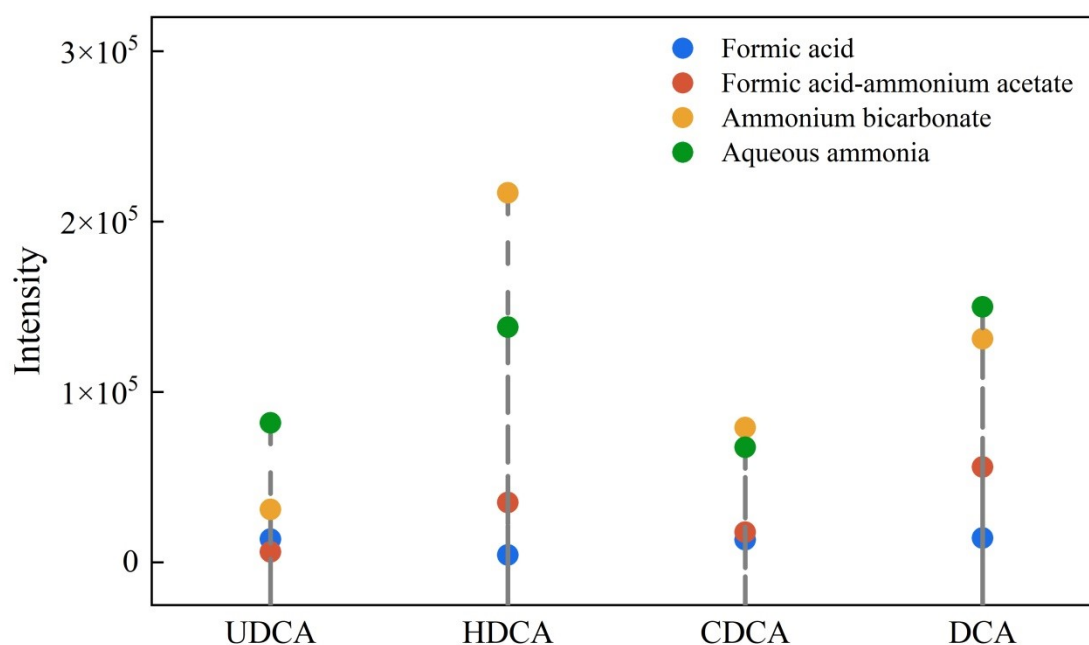

Fig. S3 Effects of mobile phase pH on signal intensity of UDCA, HDCA, CDCA and DCA using MS scan mode. The mobile phase consisted of a mixture of acetonitrile and one of the following aqueous

buffers at a volume ratio of 50:50 (v/v): 0.5% formic acid, 0.01% formic acid-5 mM ammonium acetate, 2 mM ammonium bicarbonate, or 2 mM aqueous ammonia.

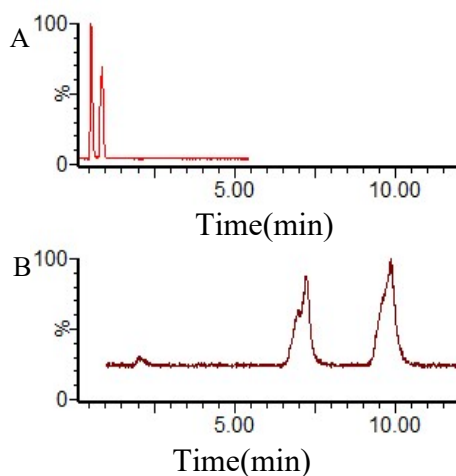

Fig. S4 Mass chromatograms of four bile acids obtained using two mobile phase systems: (A) acetonitrile-8 mM aqueous ammonia (50:50, v/v); (B) methanol-8 mM aqueous ammonia (50:50, v/v). The standard solution of the four bile acids was prepared at a concentration of 1  $\mu\text{g/mL}$ , with an injection volume of 2  $\mu\text{L}$ .

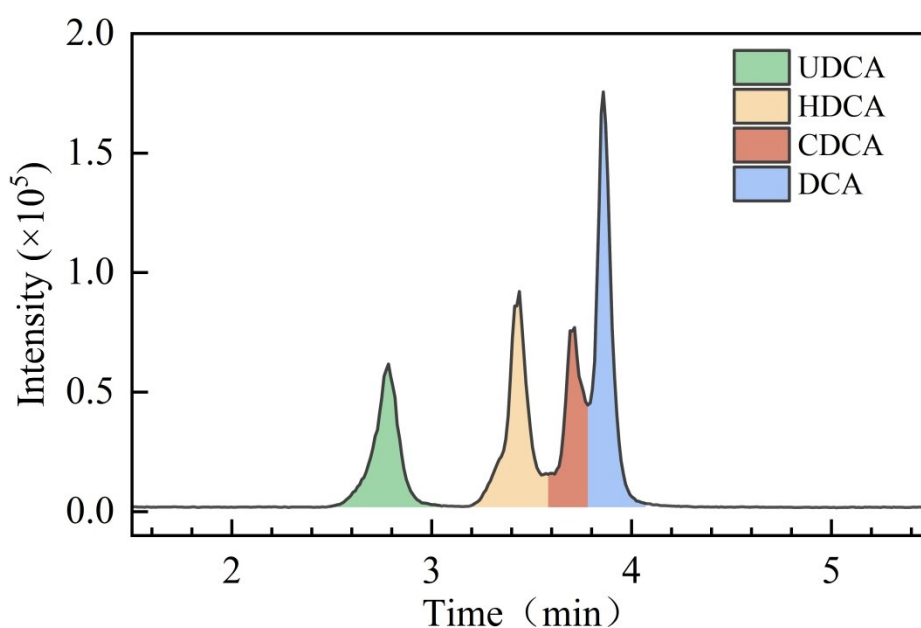

Fig. S5 Chromatograms of UDCA, CDCA, HDCA and DCA analysed with Fluoro-Phenyl chromatography column. The mobile phase was composed of 8 mM aqueous ammonia (A) and acetonitrile (B). The flow rate was 0.3 mL/min. The gradient elution program was as follows: 0 min, 15% B; 4.0 min, 22% B; 6.0 min, 30%B; 8.0 min, 40% B; 8.1 min, 15% B; 10.0 min, 15% B.

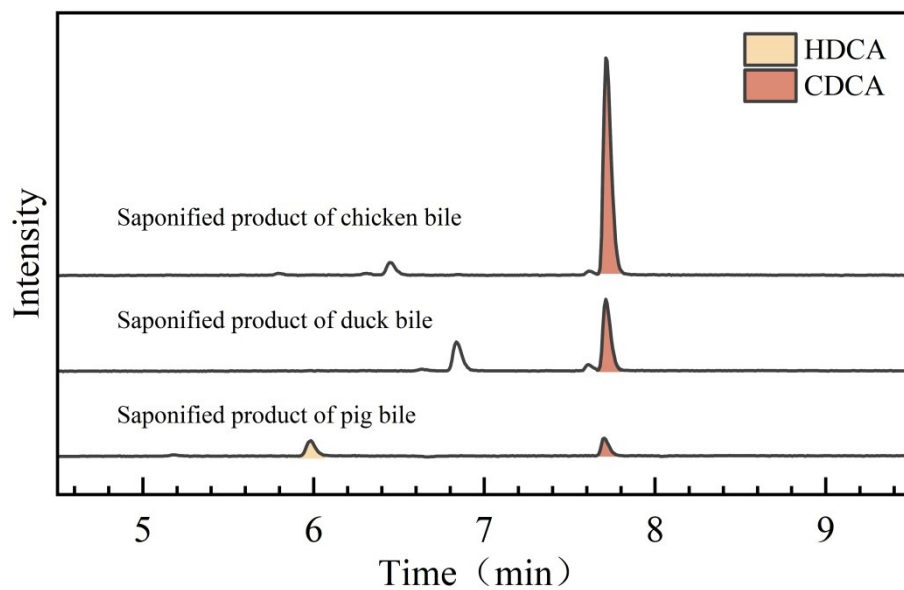

Fig. S6 Chromatograms of bile samples from poultry and pig. The mobile phase was composed of 8 mM aqueous ammonia (A) and acetonitrile (B). The flow rate was 0.3 mL/min. The gradient elution program was as follows: 0 min, 15% B; 4.0 min, 22% B; 6.0 min, 30%B; 8.0 min, 40% B; 8.1 min, 15% B; 10.0 min, 15% B.
